# Supplementary material
Source: publisher site journal article supplement (https://www.degruyter.com/publication/journal_key/ANS/downloadAsset/ANS_CFP%20Geometric%20Partial%20Differential%20Equations%20and%20Applications.pdf)
Supplement: Supplementary file 1 [file ANS_CFP%20Geometric%20Partial%20Differential%20Equations%20and%20Applications.pdf]

# GEOMETRIC PARTIAL DIFFERENTIAL EQUATIONS AND APPLICATIONS

## GUEST EDITORS

---

Guozhen Lu, University of Connecticut, [guozhenlu.ans@gmail.com](mailto:guozhenlu.ans@gmail.com)

Xi-Nan Ma, University of Science and Technology of China, [xinan@ustc.edu.cn](mailto:xinan@ustc.edu.cn)

William Minicozzi, Massachusetts Institute of Technology, [minicozz@math.mit.edu](mailto:minicozz@math.mit.edu)

Weimin Sheng, Zhejiang University, [shengweimin@zju.edu.cn](mailto:shengweimin@zju.edu.cn)

## DESCRIPTION

---

This Special Issue of “Geometric Partial Differential Equations and Applications” to be published in de Gruyter journal Advanced Nonlinear Studies (ANS) focusses on recent significant progress in areas connected to fully nonlinear Partial Differential Equations, conformal and CR geometry, general relativity theory, and related areas. It is therefore meant to touch on various topics including but not limited to

- ▶ Geometric flows;
- ▶ Monge-Ampère equations type and other fully nonlinear partial differential equations related to problems in differential geometry, complex geometry, and physics;
- ▶ Conformal geometry;
- ▶ CR geometry;
- ▶ Positive mass theorem;
- ▶ Sharp geometric inequalities and uniformization theorem.

The authors are requested to submit their full research papers complying with the general scope of the journal. The submitted papers will undergo peer-review process before they can be accepted. Notification of acceptance will be communicated as we progress with the review process.

## HOW TO SUBMIT

---

Submissions to this special issue are per invitation only.

All submissions to the Special Issue must be made electronically via online submission system Editorial Manager at:

[www.editorialmanager.com/dgans/default1.aspx](http://www.editorialmanager.com/dgans/default1.aspx)

Contributions submitted to this journal must be written in clear and concise English. Only unpublished material can be considered. The decision on acceptance is after peer-review. The authors can provide the names and e-mail addresses of up to four potential reviewers. The submitted paper will undergo the standard peer-review process (single blind, at least two independent reviewers). When entering your submission choose the section/category Special Issue on Geometric PDEs and Applications. Submission of a manuscript implies that the work described has not been published before and it is not under consideration for publication elsewhere.

The deadline for submissions is **July 31, 2022**. Individual papers will be reviewed on an ongoing basis, but the Special Issue will be published online only once all articles have been accepted. It is expected that the Special Issue will be published at the beginning of the 2023 volume.

## INFORMATION ABOUT THE JOURNAL

---

**Advanced Nonlinear Studies** (ANS) was founded as a traditional journal in 2001. It publishes cutting-edge original research on nonlinear problems, particularly those involving Partial Differential Equations, Calculus of Variations, Geometric Analysis, and related areas. From 2022 onwards, ANS will move to an Open Access model. All papers published in ANS will be freely accessible to all readers. It is greatly appreciated if authors who submit to this special issue are willing to contribute part or whole of the Article Processing Charge (APC) to cover the production cost. However, for invited authors with limited funding sources, it is not mandatory to pay the APC.
